# Supplementary material for: Hydrological Response of Andean Catchments to Recent Glacier Mass Loss
Source: Copernicus journal article supplement (doi:10.5194/egusphere-2023-888), 2023-05-23
Supplement: Supplementary file 1 [file egusphere-2023-888-supplement.pdf]

## Supplementary data

# Hydrological Response of Andean Catchments to Recent Glacier Mass Loss

Alexis Caro et al.

Correspondence to: Alexis Caro (alexis.caro.paredes@gmail.com)

The supplementary material contains: Availability of data by glacier and catchment, data for evaluation and results, precipitation factor fit and climate correlations regarding annual mass balance.

## 1 Availability of data by glacier and catchment

Simulations in 786 Andean catchments are available. Each folder per catchment contains: glacier mass balance, area, volume, temperature, precipitation, glacier melt and rainfall on glaciers. These data were processed per glacier and per catchment at annual temporal resolution. In addition, glacier melt and rainfall on glaciers are available at a monthly time step per catchment. Data are available at glacier and catchment scale.

## 2 Climate evaluation

This section describes the data used to evaluate the TerraClimate dataset: temperature data recorded at meteorological stations in glaciers and outside them, lapse rate estimation per glaciological zone and the precipitation factors estimation.

### 2.1 Historical Climate data

In Table S1 are described the characteristics of 35 meteorological stations off and on glacier surface between 9°-51°S.

**Table S1. Meteorological stations used to generate vertical temperature lapse rates and validate TerraClimate dataset on or near of glaciers across the Andes.**

| ID | Zone | Weather station name | Coordinates [°] |            | Elevation [m a.s.l.] |         | Surface        | Range date |         | Reference            |
|----|------|----------------------|-----------------|------------|----------------------|---------|----------------|------------|---------|----------------------|
|    |      |                      | Lat             | Lon        | Station              | TC grid |                | start      | end     |                      |
| 1  | OT   | Llan_Up-2            | -9.05           | -<br>77.60 | 4122                 | 4354    | Off<br>glacier | 08/2006    | 06/2019 | Mateo et al., 2022   |
| 2  | OT   | CuchWX               | -9.41           | -<br>77.36 | 4642                 | 4694    | Off<br>glacier | 08/2013    | 12/2019 |                      |
| 3  | OT   | Huaytapallana        | -11.93          | -<br>75.06 | 4684                 | 4632    | Off<br>glacier | 01/2018    | 12/2019 | SENAMHI, 2022        |
| 4  | OT   | Quisoquepina         | -13.80          | -<br>70.89 | 5157                 | 5313    | Off<br>glacier | 05/2015    | 12/2019 |                      |
| 5  | OT   | Zongo off glacier    | -16.28          | -<br>68.14 | 5050                 | 4836    | Off<br>glacier | 10/1995    | 12/2018 | GLACIOCLIM,<br>2022  |
| 6  | OT   | Zongo on glacier     | -16.28          | -<br>68.14 | 5050                 | 4836    | On glacier     | 09/2004    | 08/2019 |                      |
| 7  | DA1  | La Frontera          | -29.30          | -<br>70.01 | 4927                 | 5074    | Off<br>glacier | 01/2002    | 04/2007 | Rabatel et al., 2011 |

|    |           |                                  |        |        |      |      |             |         |         |                         |
|----|-----------|----------------------------------|--------|--------|------|------|-------------|---------|---------|-------------------------|
| 8  | DA1       | Estrecho glacier                 | -29.30 | -      | 5102 | 5074 | On glacier  | 04/2014 | 03/2015 | Hernández et al., 2021  |
| 9  | DA1       | Guanaco glacier                  | -29.31 | -      | 5324 | 5074 | On glacier  | 11/2008 | 04/2011 | MacDonnell et al., 2013 |
| 10 | DA1       | Tapado glacier                   | -30.15 | -      | 4727 | 4502 | Off glacier | 05/2018 | 12/2019 | CEAZA, 2022             |
| 11 | DA1       | Tapado morrena                   | -30.16 | -      | 4318 | 4502 | Off glacier | 11/2009 | 04/2013 | DGA, 2022               |
| 12 | DA1       | La Laguna Embalse                | -30.20 | -      | 3160 | 3434 | Off glacier | 01/1980 | 12/2019 |                         |
| 13 | DA2       | Juncal Sur glacier               | -33.12 | -      | 4035 | 4189 | Off glacier | 01/2019 | 12/2019 |                         |
| 14 | DA2       | Olivares Gamma glacier           | -33.16 | -      | 3628 | 4002 | Off glacier | 05/2014 | 12/2019 |                         |
| 15 | DA2       | Estero Yerba Loca en P. Carvajal | -33.22 | -      | 3250 | 4148 | Off glacier | 01/2012 | 12/2017 |                         |
| 16 | DA2       | Bello glacier                    | -33.53 | -      | 4134 | 4071 | On glacier  | 11/2013 | 04/2018 |                         |
| 17 | DA2       | Yeso glacier                     | -33.53 | -      | 4428 | 4375 | On glacier  | 11/2013 | 04/2018 |                         |
| 18 | DA2       | Portezuelo Echaurren             | -33.58 | -      | 3847 | 3603 | Off glacier | 03/2016 | 12/2019 |                         |
| 19 | DA2       | Pirámide glacier                 | -33.59 | -      | 3459 | 3924 | On glacier  | 11/2013 | 04/2018 |                         |
| 20 | DA2       | El Yeso Embalse                  | -33.68 | -      | 2475 | 2705 | Off glacier | 01/1980 | 12/2019 |                         |
| 21 | DA3       | G. San Franc. en A. P.           | -33.75 | -      | 2238 | 2895 | Off glacier | 10/2011 | 12/2019 | DGA, 2022               |
| 22 | DA3       | San Francisco glacier            | -33.80 | -      | 3466 | 3544 | On glacier  | 11/2013 | 04/2015 |                         |
| 23 | DA3       | Cipreses glacier                 | -34.54 | -      | 1880 | 1961 | Off glacier | 11/2016 | 12/2019 |                         |
| 24 | DA3       | Cortaderal glacier               | -34.66 | -      | 3156 | 3273 | Off glacier | 05/2018 | 12/2019 |                         |
| 25 | WA1-2     | La Punilla                       | -36.66 | -      | 840  | 898  | Off glacier | 01/1980 | 10/1986 | DGA, 2022               |
| 26 | WA1-2     | Volcán Chillán                   | -36.89 | -71.41 | 2200 | -    | Off glacier | 03/2015 | 12/2019 |                         |
| 27 | WA1-2     | Mocho nunatak                    | -39.93 | -      | 1970 | 1523 | Off glacier | 05/2006 | 10/2014 | Schaefer et al., 2017   |
| 28 | WA3-4-5-6 | San Rafael glacier               | -46.70 | -      | 1187 | 1188 | On glacier  | 07/2012 | 12/2019 | DGA, 2022               |
| 29 | WA3-4-5-6 | Rio Nef A. J. E. El Revalse      | -47.14 | -      | 281  | 551  | Off glacier | 01/2012 | 12/2017 |                         |
| 30 | WA3-4-5-6 | Glaciar Colonia en Lago Cachet-2 | -47.20 | -      | 451  | 570  | Off glacier | 01/2011 | 12/2019 |                         |
| 31 | WA3-4-5-6 | Greve glacier                    | -48.83 | -      | 1428 | 1377 | On glacier  | 10/2014 | 07/2016 |                         |
| 32 | WA3-4-5-6 | O'Higgins                        | -48.88 | -      | 250  | 699  | Off glacier | 01/2014 | 12/2019 |                         |
| 33 | WA3-4-5-6 | Candelario Mancilla              | -48.93 | -      | 300  | 370  | Off glacier | 12/2004 | 12/2017 |                         |
| 34 | WA3-4-5-6 | Aonikenk                         | -49.29 | -      | 1200 | 1376 | Off glacier | 03/2014 | 12/2019 | IANIGLA, 2022           |
| 35 | WA3-4-5-6 | Dickson glacier                  | -50.79 | -      | 221  | 529  | Off glacier | 11/2018 | 12/2019 | CECs, 2018              |

## 2.2 Temperature lapse rates

In general, short air temperature records were observed on stations located over glaciers (Estrecho in 29°S, and Juncal Sur and Olivares in 33°S, over the 4000 m a.s.l.), whereas the longer records comes from stations located off glaciers (El Yeso Embalse in 33°S, La Laguna Embalse in 30°S and off Glacier Zongo in 16°S, over 2400 m a.s.l.). The short records are associated with recent dates before December 2019 and the longer ones start from 1980. The vertical temperature lapse rates were obtained using a minimum of 3 stations (cluster WA1-2) and a maximum of 8 meteorological stations (cluster WA3-4-5-6) at cluster scale (Figure S1).

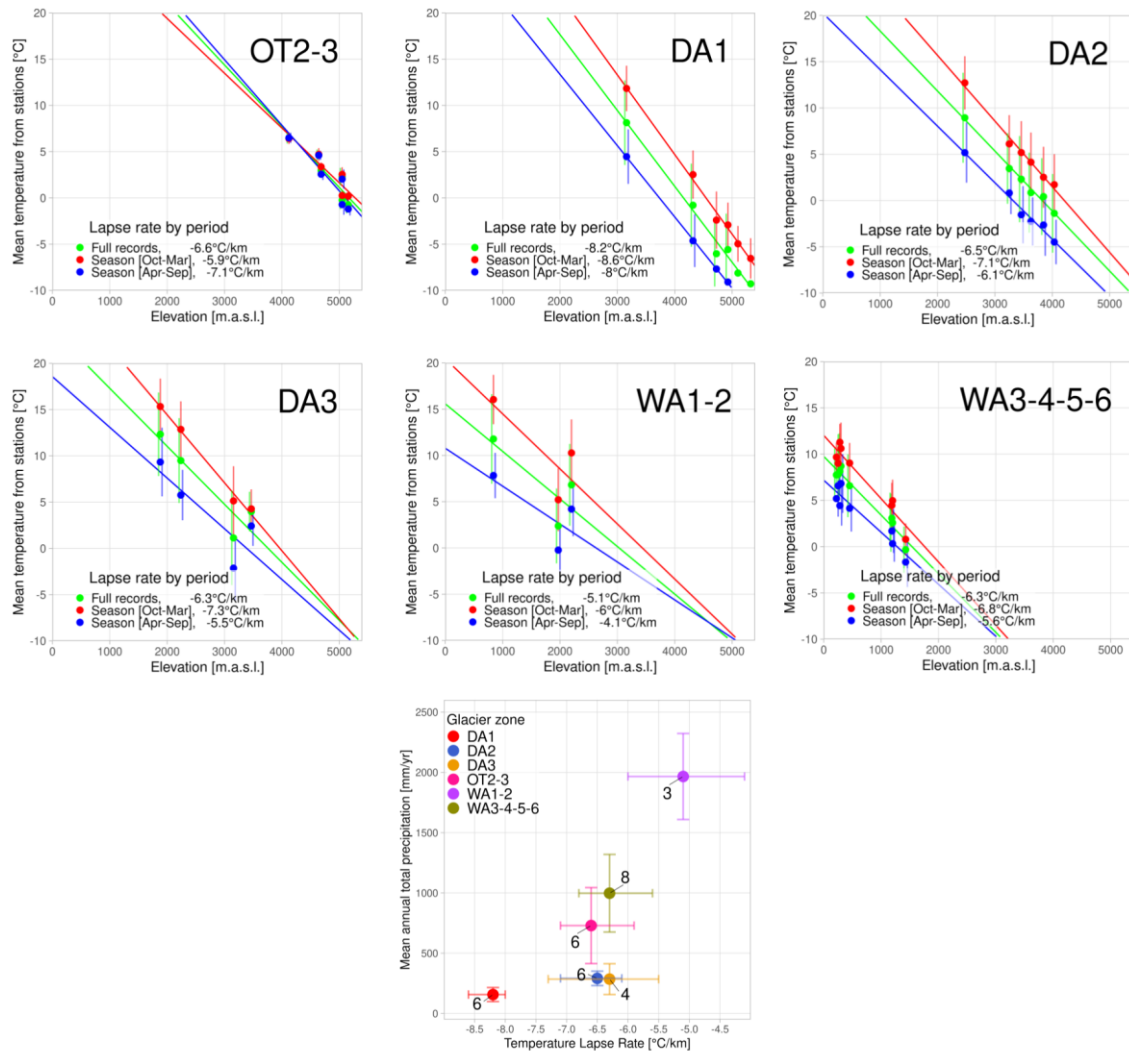

Figure S1. Temperature lapse rates at glaciological zone scale using meteorological records at monthly time step from 1980 to 2019.

## 2.3 Historical assessment of TerraClimate

In this section, the TerraClimate temperature was evaluated regarding meteorological station measurements (Table S1). Table S2 shows the temperature assessment results in 35 weather stations before and after the application of the lapse rate per glaciological zone, whereas, Figure S2 displays the monthly evaluations.

| ID | Zone      | Weather station name                  | Weather Station [°C] |     | Corrected TerraClimate [°C] |     | Raw TerraClimate [°C] |     | N° of Months |
|----|-----------|---------------------------------------|----------------------|-----|-----------------------------|-----|-----------------------|-----|--------------|
|    |           |                                       | Mean                 | SD  | Mean                        | SD  | Mean                  | SD  |              |
| 1  | OT        | Llan_Up-2                             | 6.4                  | 0.2 | 5.4                         | 0.2 | 3.9                   | 1.2 | 113          |
| 2  | OT        | CuchWX                                | 4.7                  | 0.4 | 4.4                         | 0.2 | 4                     | 1.2 | 48           |
| 3  | OT        | Huaytapallana                         | 3                    | 0.2 | 6.3                         | 0.2 | 6.6                   | 0.6 | 24           |
| 4  | OT        | Quisoquepina                          | -0.4                 | 0.1 | 2.7                         | 0.4 | 1.6                   | 1.9 | 21           |
| 5  | OT        | Zongo off glacier                     | 2.3                  | 0.1 | 2                           | 0.1 | 3.4                   | 1.8 | 220          |
| 6  | OT        | Zongo on glacier                      | -0.3                 | 0.4 | 2.1                         | 0.2 | 3.6                   | 1.8 | 85           |
| 7  | DA1       | La Frontera                           | -6.2                 | 0.6 | 0.4                         | 0.3 | -0.8                  | 2.8 | 58           |
| 8  | DA1       | Estrecho glacier                      | -8.1                 | NA  | -1.9                        | NA  | -1.7                  | 2.7 | 12           |
| 9  | DA1       | Guanaco glacier                       | -10                  | 0.5 | -4.1                        | 0.5 | -2                    | 3.2 | 30           |
| 10 | DA1       | Tapado glacier                        | -5                   | 0.6 | -3.2                        | 0.4 | -1.4                  | 3.7 | 16           |
| 11 | DA1       | Tapado morrena                        | -1.2                 | 0.6 | 0                           | 0.2 | -1.5                  | 3.7 | 41           |
| 12 | DA1       | La Laguna Embalse                     | 8.1                  | 0.4 | 4.1                         | 0.1 | 1.8                   | 3.6 | 476          |
| 13 | DA2       | Juncal Sur glacier                    | -1.4                 | NA  | -1.7                        | NA  | -2.7                  | 4.9 | 12           |
| 14 | DA2       | Olivares Gamma glacier                | 1.1                  | 0.5 | 0.3                         | 0.4 | -2.3                  | 4.6 | 68           |
| 15 | DA2       | Estero Yerba Loca en P. Carvajal      | 3.5                  | 1.1 | -0.7                        | 0.3 | -6.9                  | 4.2 | 72           |
| 16 | DA2       | Bello glacier                         | 0.3                  | 1.3 | 0.3                         | 0.5 | 0.8                   | 2.6 | 18           |
| 17 | DA2       | Yeso glacier                          | -1.6                 | 0.8 | -0.2                        | 0.4 | 0.2                   | 1.8 | 15           |
| 18 | DA2       | Portezuelo Echaurren                  | -0.4                 | 1.3 | -0.2                        | 0.6 | 1.4                   | 5.1 | 37           |
| 19 | DA2       | Pirámide glacier                      | 1.5                  | 0.8 | 1.4                         | 0.7 | -1.8                  | 4.6 | 42           |
| 20 | DA2       | El Yeso Embalse                       | 8.9                  | 0.4 | 0.9                         | 0.1 | -0.7                  | 4.5 | 480          |
| 21 | DA3       | G. San Francisco en A. P.             | 9.4                  | 0.4 | 12.1                        | 0.3 | 7.8                   | 4.7 | 95           |
| 22 | DA3       | San Francisco glacier                 | 3.8                  | 0.9 | 7.6                         | 0.8 | 7.1                   | 2.3 | 13           |
| 23 | DA3       | Cipreses glacier                      | 12.4                 | 1.3 | 5.9                         | 0.3 | 5.4                   | 4.8 | 36           |
| 24 | DA3       | Cortaderal glacier                    | 2.2                  | 2.3 | 0.3                         | 0.4 | -0.5                  | 4.8 | 20           |
| 25 | WA1-2     | La Punilla                            | 11.9                 | 0.5 | 10.6                        | 0.3 | 10.2                  | 4.8 | 81           |
| 26 | WA1-2     | Volcán Chillán                        | 6.8                  | 4.4 | -                           | -   | -                     | -   | -            |
| 27 | WA1-2     | Mocho nunatak                         | 2.6                  | 0.5 | 4.2                         | 0.3 | 7.1                   | 4.1 | 102          |
| 28 | WA3-4-5-6 | San Rafael glacier                    | 3.1                  | 0.3 | 2.6                         | 0.2 | 2.6                   | 3.2 | 90           |
| 29 | WA3-4-5-6 | Rio Nef Antes Junta Estero El Revalse | 7.8                  | 0.4 | 5.5                         | 0.3 | 3.8                   | 3.6 | 61           |
| 30 | WA3-4-5-6 | Glaciar Colonia en Lago Cachet-2      | 6.6                  | 0.4 | 7.8                         | 0.3 | 7.1                   | 3.6 | 84           |

|    |           |                     |      |     |     |     |     |     |    |
|----|-----------|---------------------|------|-----|-----|-----|-----|-----|----|
| 31 | WA3-4-5-6 | Greve glacier       | -0.7 | 0.8 | 1.4 | 0.4 | 1.7 | 2.9 | 22 |
| 32 | WA3-4-5-6 | O'Higgins           | 7.8  | 0.3 | 7.7 | 0.2 | 4.8 | 3.2 | 72 |
| 33 | WA3-4-5-6 | Candelario Mancilla | 8.7  | 0.9 | 6.7 | 0.3 | 6.2 | 3.5 | 99 |
| 34 | WA3-4-5-6 | Aonikenk            | 2.7  | 0.7 | 5.4 | 0.2 | 4.3 | 3.3 | 70 |
| 35 | WA3-4-5-6 | Dickson glacier     | 7.4  | 0.6 | 7.9 | 0.2 | 5.9 | 3.1 | 14 |

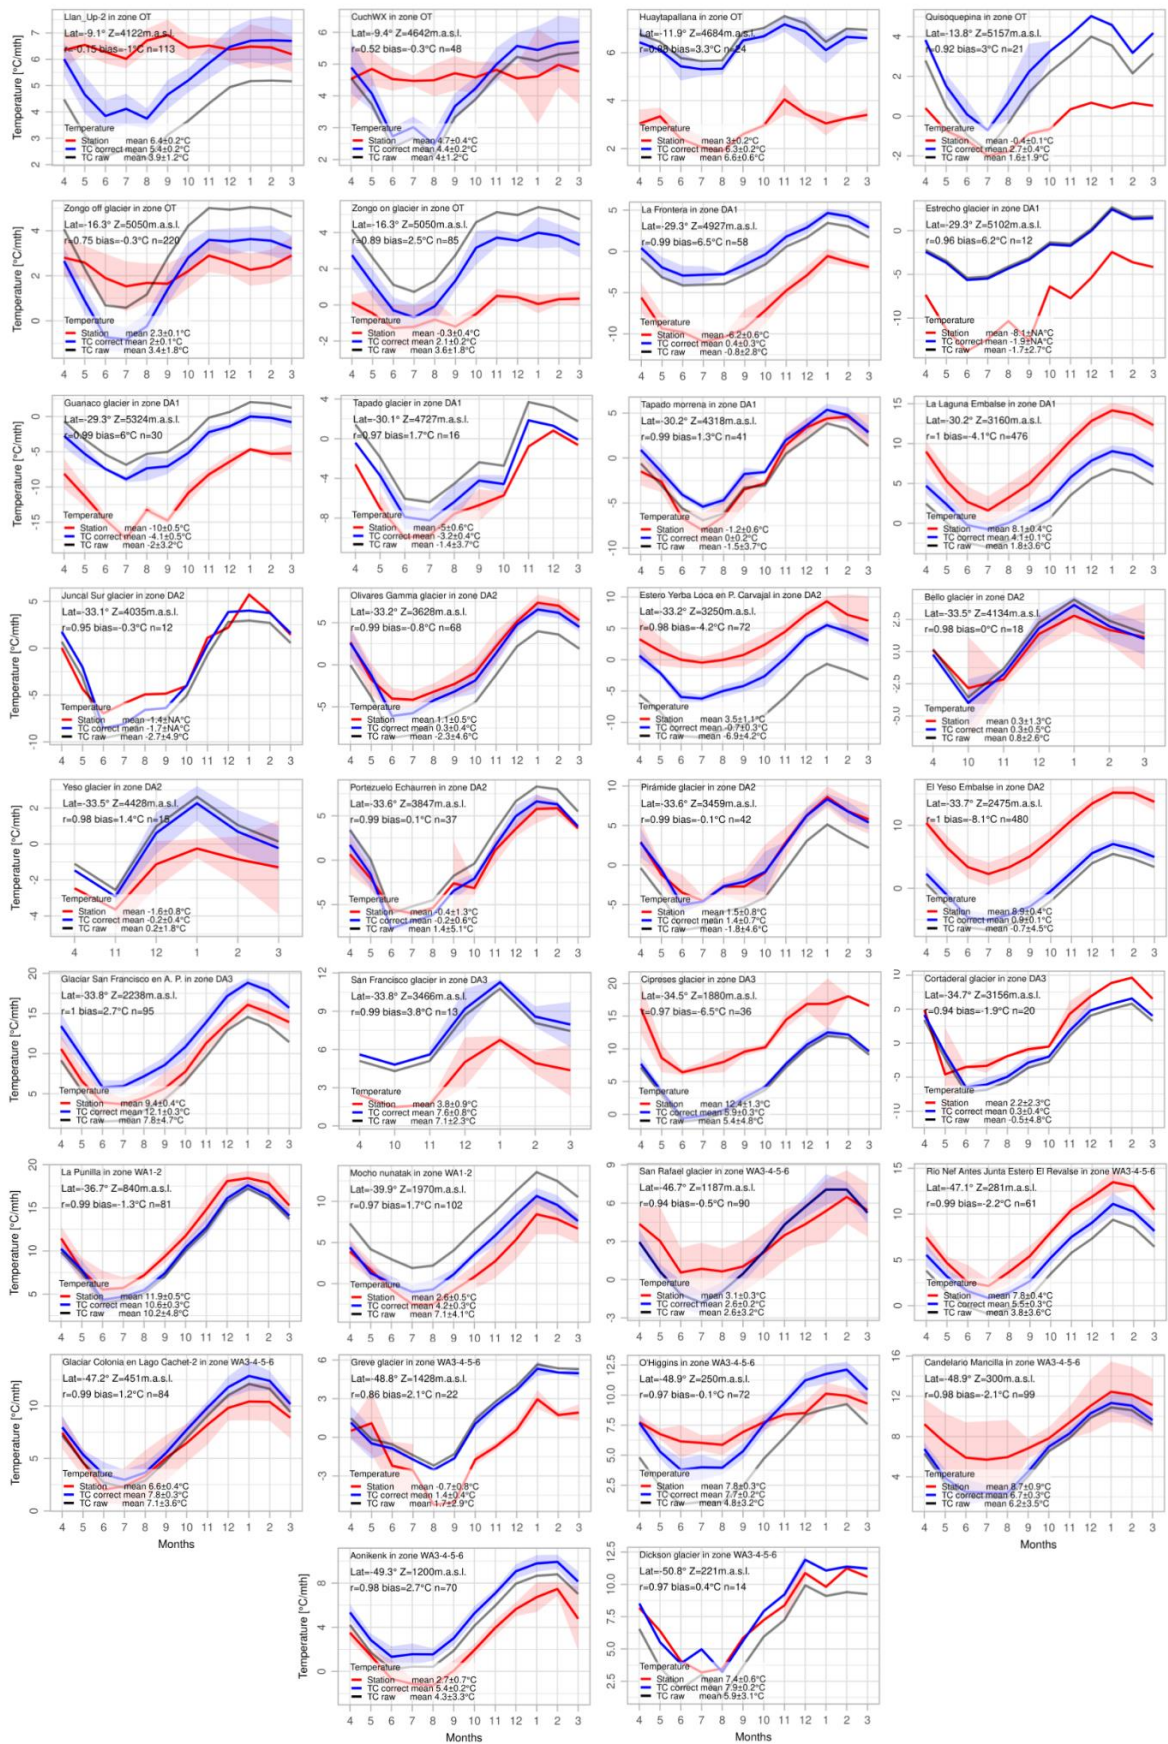

Figure S2. Monthly TerraClimate temperature and temperature records comparison in 34 weather stations on and near of glaciers across the Andes.

## 2.4 Precipitation factor fitting

The results of the precipitation factor adjustment in 18 glaciers along the Andes are presented in Table S3. Despite the Pf estimation in Tropical Andes we used Pf = 1, due high precipitation overestimation observed after ran the simulations.

**Table S3. Standard deviation of annual mass balance for observed and simulated glaciers.**  
Orange color shows high SD differences whereas the blue color show close SD between mb observed and simulated.

| RGIv6.0 id     | Name              | Pf  | LR [°C/k m] | Sim mb mean [mm w.e.] | Sim mb sd [mm w.e.] | Obs mb mean [mm w.e.] | Obs mb sd [mm w.e.] | Start year | End year | Glaciological zone | Final Pf |
|----------------|-------------------|-----|-------------|-----------------------|---------------------|-----------------------|---------------------|------------|----------|--------------------|----------|
| RGI60-16.01339 | Antisana 15 Alpha | 1   | -6.6        | -114                  | 540                 | -511                  | 490                 | 2000       | 2019     | IT                 | 1        |
| RGI60-16.01355 | Conejeras         | 1   | -6.6        | -1971                 | 1628                | -3300                 | 1587                | 2006       | 2019     | IT                 |          |
| RGI60-16.00532 | Charquini Sur     | 4   | -6.6        | -437                  | 138                 | -918                  | 1055                | 2003       | 2018     | OT                 | 1        |
| RGI60-16.00543 | Zongo             | 4   | -6.6        | -472                  | 352                 | -248                  | 520                 | 2000       | 2018     | OT                 |          |
| RGI60-16.01447 | Chacaltaya        | 2.4 | -6.6        | 219                   | 620                 | -1314                 | 616                 | 2000       | 2008     | OT                 |          |
| RGI60-16.02086 | Yanamarey         | 4   | -6.6        | -1073                 | 411                 | -1078                 | 728                 | 2005       | 2019     | OT                 |          |
| RGI60-16.02444 | Artesonraju       | 1   | -6.6        | -469                  | 759                 | -828                  | 610                 | 2005       | 2019     | OT                 |          |
| RGI60-17.00466 | Azufre            | 4   | -6.5        | -2562                 | 421                 | -2955                 | 499                 | 2018       | 2019     | DA3                | 4        |
| RGI60-17.02128 | Martial Este      | 2.3 | -6.4        | -281                  | 576                 | -183                  | 569                 | 2001       | 2019     | WA3-4-5-6          | 2.3      |
| RGI60-17.12440 | Mocho-Choshuenco  | 4   | -6.5        | -1003                 | 1008                | -908                  | 1041                | 2004       | 2019     | WA2                | 4        |
| RGI60-17.13715 | Echaurren         | 4   | -6.9        | -517                  | 760                 | -832                  | 1356                | 2000       | 2019     | DA2                | 1.9      |
| RGI60-17.14203 | Piloto Este       | 1.9 | -6.9        | 237                   | 742                 | -463                  | 751                 | 2000       | 2003     | DA2                |          |
| RGI60-17.14642 | Agua Negra        | 3.2 | -8.2        | -850                  | 493                 | -383                  | 492                 | 2015       | 2019     | DA1                | 2.8      |
| RGI60-17.14868 | Guanaco Oeste     | 1.1 | -8.2        | -376                  | 400                 | -619                  | 396                 | 2004       | 2015     | DA1                |          |
| RGI60-17.14872 | Toro 2            | 4   | -8.2        | -73                   | 401                 | -1097                 | 626                 | 2004       | 2009     | DA1                |          |
| RGI60-17.14874 | Esperanza         | 4   | -8.2        | -171                  | 455                 | -1137                 | 962                 | 2004       | 2009     | DA1                |          |
| RGI60-17.14887 | Amarillo          | 3.8 | -8.2        | -380                  | 842                 | -295                  | 1665                | 2008       | 2019     | DA1                |          |
| RGI60-17.14889 | Los Amarillos     | 4   | -8.2        | -199                  | 297                 | -296                  | 1100                | 2008       | 2019     | DA1                |          |

## 3 Mass Balance evaluation

This section describes the data used to evaluate the simulated mass balance regarding observations.

### 3.1 Mass balance observations

In table S4 are described the characteristics of 15 monitored glaciers with mass balance measurements located between 5°N-55°S. We filtered glaciers with mass balance observations with a greater geodetic mass balance error that its mass balance estimation from Hugonnet et al.(2021) between 2000-2019, such as Chacaltaya (RGI60-16.01447;  $-0.16 \pm 0.17$  m w.e.), Los Amarillos (RGI60-17.14889;  $-0.14 \pm 0.15$  m w.e.), Toro 2 (RGI60-17.14872; -

0.13±0.19 m w.e.), Antisana 15 Alpha (RGI60-16.01339; -0.11±0.12 m w.e.). As well as, very small monitored glaciers like Esperanza glacier (RGI60-17.14874; 0.1 km<sup>2</sup>).

**Table S4. In situ glaciological mass balance measurements on 15 glaciers used to validate OGGM simulated mass balance across the Andes**

| N° | Zone | Glacier name     | Coordinates [°] |           | Elevation [m a.s.l.] | Glacier area [km <sup>2</sup> ] | RGIv6.0 id     | Mass balance observation references |
|----|------|------------------|-----------------|-----------|----------------------|---------------------------------|----------------|-------------------------------------|
|    |      |                  | Latitude        | Longitude |                      |                                 |                |                                     |
| 1  | IT   | Conejeras        | 4.8             | -75.4     | 4791                 | 3.8                             | RGI60-16.01355 | WGMS, 2021                          |
| 2  | OT   | Zongo            | -16.3           | -68.1     | 5320                 | 2.3                             | RGI60-16.00543 |                                     |
| 3  | DA1  | Guanaco Oeste    | -29.3           | -70       | 5163                 | 1.8                             | RGI60-17.14868 |                                     |
| 4  | DA1  | Guanaco Este     | -29.3           | -70       | 5161                 | 0.7                             | RGI60-17.14869 |                                     |
| 5  | DA1  | Amarillo         | -29.3           | -70       | 5174                 | 0.4                             | RGI60-17.14887 |                                     |
| 6  | DA1  | Estrecho         | -29.3           | -70       | 5194                 | 1.9                             | RGI60-17.14892 |                                     |
| 7  | DA1  | Ortigas 1        | -29.4           | -70.1     | 5003                 | 1.2                             | RGI60-17.14849 |                                     |
| 8  | DA1  | Agua Negra       | -30.2           | -69.8     | 4971                 | 1.1                             | RGI60-17.14642 |                                     |
| 9  | DA2  | Piloto Este      | -32.6           | -70.1     | 4481                 | 2.9                             | RGI60-17.14203 |                                     |
| 10 | DA2  | Paula            | -33.2           | -70.3     | 4688                 | 0.1                             | RGI60-17.13879 | Marangunic et al., 2021             |
| 11 | DA2  | Paloma Oeste     | -33.2           | -70.3     | 4408                 | 0.6                             | RGI60-17.13882 |                                     |
| 12 | DA2  | Paloma Este      | -33.2           | -69.7     | 4762                 | 0.6                             | RGI60-17.13883 |                                     |
| 13 | DA2  | Del Rincón       | -33.2           | -70.1     | 5050                 | 0.4                             | RGI60-17.13887 |                                     |
| 14 | WA2  | Mocho-Choshuenco | -39.9           | -72       | 1963                 | 6.3                             | RGI60-17.12440 | WGMS,2021                           |
| 15 | WA4  | Martial Este     | -54.8           | -68.4     | 1091                 | 0.7                             | RGI60-17.02128 |                                     |

### 3.2 Superficial mass balance assessment

In this section, the results of simulated mass balance evaluation from OGGM regarding in situ measurements are presented. Table S5 shows the results of the evaluation in 15 Andean glaciers. The results of annual mass balance differences and cumulative mass balance differences per glacier are displayed in Figure S3 and Figure S4.

**Table S5. OGGM mass balance evaluation on 15 glaciers using in situ measurements from the Tropical Andes to the Wet Andes (2000-2019)**

| N° | Zone | Glacier name | MB Obs [mm] | MB Sim [mm] | MB Hugonnet et al. 2021 | Date range | Person corr | p-value | r <sup>2</sup> | RMSE [mm] | bias [mm] |
|----|------|--------------|-------------|-------------|-------------------------|------------|-------------|---------|----------------|-----------|-----------|
|----|------|--------------|-------------|-------------|-------------------------|------------|-------------|---------|----------------|-----------|-----------|



|    |         |                      |            |            | 2000-2019<br>[mm] |           |      |      |     |      |      |
|----|---------|----------------------|------------|------------|-------------------|-----------|------|------|-----|------|------|
| 1  | IT      | Conejeras            | -3300±1587 | -2196±2582 | -1644±283         | 2006-2019 | 0.9  | 0    | 0.8 | 704  | 1104 |
| 2  | OT      | Zongo                | -248±520   | -471±299   | -548±148          | 2000-2018 | 0.3  | 0.22 | 0.1 | 484  | -224 |
| 3  | DA1     | Guanaco Oeste        | -477±638   | -396±573   | -393±154          | 2003-2015 | 0    | 0.93 | 0.0 | 613  | 81   |
| 4  | DA1     | Guanaco Este         | -477±638   | -340±572   | -347±176          | 2003-2015 | 0    | 0.93 | 0.0 | 613  | 137  |
| 5  | DA1     | Amarillo             | -295±1665  | -345±663   | -204±168          | 2008-2019 | 0    | 0.89 | 0.0 | 1592 | -50  |
| 6  | DA1     | Estrecho             | -682±379   | -462±593   | -411±159          | 2007-2014 | 0.6  | 0.11 | 0.4 | 281  | 220  |
| 7  | DA1     | Ortigas 1            | -1036±630  | -358±549   | -320±158          | 2007-2014 | 0    | 1    | 0.0 | 589  | 679  |
| 8  | DA1     | Agua Negra           | -383±492   | -828±455   | -524±171          | 2015-2019 | -0.7 | 0.17 | 0.5 | 303  | -445 |
| 9  | DA2     | Piloto Este          | -462±751   | 243±753    | -318±150          | 2000-2003 | 0.8  | 0.21 | 0.6 | 395  | 706  |
| 10 | DA2     | Paula                | -967±639   | -963±568   | -383±286          | 2014-2019 | 0.8  | 0.08 | 0.6 | 384  | 4    |
| 11 | DA2     | Paloma Oeste         | -1217±913  | -1102±500  | -589±237          | 2014-2019 | 0.7  | 0.1  | 0.5 | 564  | 114  |
| 12 | DA2     | Paloma Este          | -1090±1102 | -876±498   | -288±183          | 2015-2019 | 0.8  | 0.08 | 0.7 | 542  | 214  |
| 13 | DA2     | Del Rincón           | -762±361   | -283±484   | 17±252            | 2014-2019 | 0.8  | 0.05 | 0.7 | 191  | 479  |
| 14 | WA<br>2 | Mocho-<br>Choshuenco | -908±1041  | -1045±1043 | -691±139          | 2004-2019 | 0.5  | 0.11 | 0.3 | 833  | -137 |
| 15 | WA<br>4 | Martial Este         | -183±569   | -280±560   | -236±224          | 2001-2019 | 0.5  | 0.02 | 0.3 | 472  | -98  |

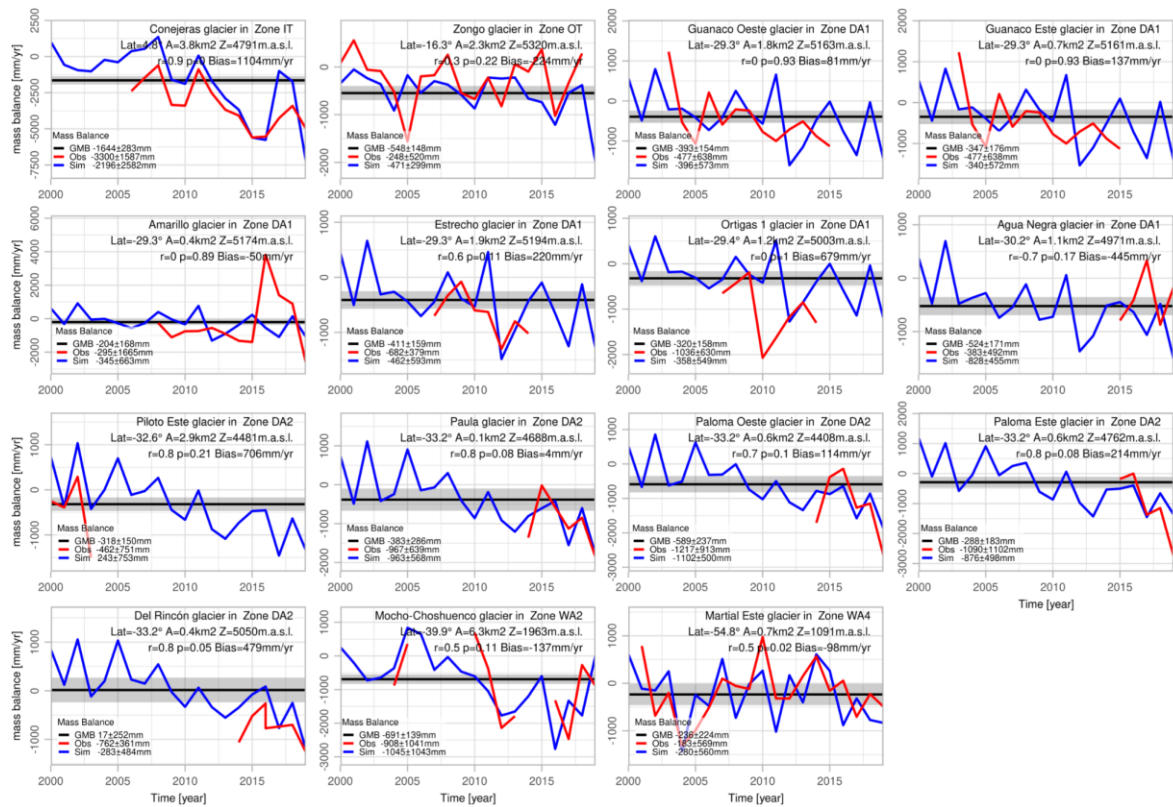

Figure S3. Annual mass balance differences between OGGM simulations and observations on 15 glaciers across the Andes (2000-2019).

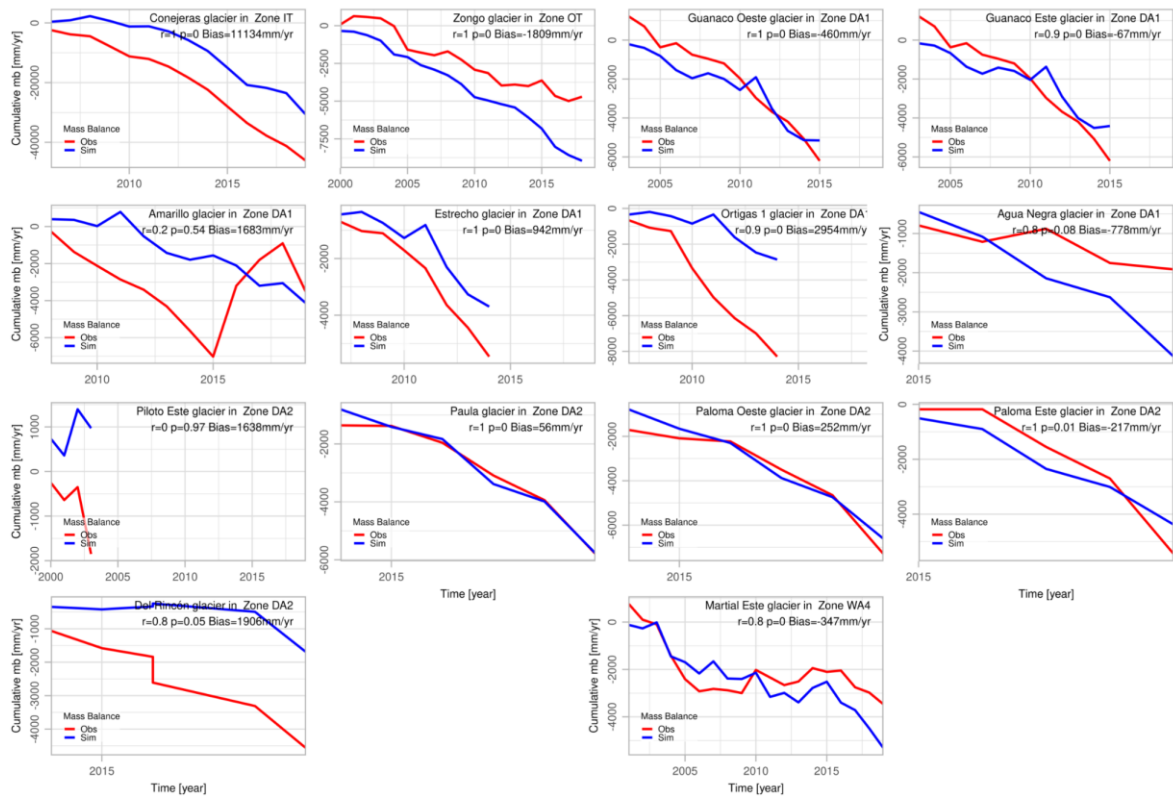

Figure S4. Cumulative mass balance differences between OGGM simulations and observations on 14 glaciers across the Andes (2000-2019).

#### 4 Morphometric and climate variables associated to catchments with glacier melt and rainfall on glaciers changes

| Table S6. Mean morphometric and climate variables on glacierized catchments with glacier melt and rainfall on glaciers changes between periods 2000-2009 and 2010-2019 |                     |                      |                         |           |                 |                           |                                                       |                  |
|------------------------------------------------------------------------------------------------------------------------------------------------------------------------|---------------------|----------------------|-------------------------|-----------|-----------------|---------------------------|-------------------------------------------------------|------------------|
| Change in contribution                                                                                                                                                 | Latitude median [°] | Elevation [m a.s.l.] | Area [km <sup>2</sup> ] | Slope [°] | Aspect mode [°] | Temperature (change) [°C] | Total precipitation (change %) [mm yr <sup>-1</sup> ] | N° of catchments |
| Glacier melt                                                                                                                                                           |                     |                      |                         |           |                 |                           |                                                       |                  |
| Increase                                                                                                                                                               | -46                 | 2404±1637            | 0.9±3.3                 | 25±7      | 120             | -0.1 (0.4)                | 2550 (-8)                                             | 661              |
| Reduction                                                                                                                                                              | -52                 | 1737±1319            | 0.5±2                   | 24±7      | 126             | 0.6 (0.3)                 | 2929 (-14)                                            | 95               |
| Not change                                                                                                                                                             | -44                 | 1944±1146            | 0.2±0.3                 | 27±7      | 110             | 0.4 (0.4)                 | 2929 (-10)                                            | 30               |
| Rainfall on glaciers                                                                                                                                                   |                     |                      |                         |           |                 |                           |                                                       |                  |
| Increase                                                                                                                                                               | -46                 | 2691±1734            | 1±3.8                   | 25±7      | 138             | -0.6 (0.4)                | 1843 (-4)                                             | 403              |
| Reduction                                                                                                                                                              | -44                 | 1898±1339            | 0.7±2.3                 | 25±8      | 110             | 1.2 (0.3)                 | 3773 (-11)                                            | 322              |
| Not change                                                                                                                                                             | -33                 | 3881±1548            | 0.5±1.7                 | 26±8      | 141             | -2.1 (0.4)                | 1547 (-10)                                            | 61               |

#### 5 Climate correlations regarding annual mass balance

Figure S7 shows statistically significant correlations ( $p$ -value < 0.05) between mean annual temperature and precipitation with the mean annual simulated mass balance in the period 2000-2019 at catchment scale across the Andes. The mean temperature correlation in 729 catchments was  $-0.74 \pm 0.1$ , while we estimated a mean precipitation correlation in 600 of  $-0.7 \pm 0.1$ . The high correlations of precipitation and mass balance in the Dry Andes and precipitation and mass balance in the Wet Andes are similar as expected from the Caro et al. (2021) estimation.

| Table S7. Mean annual temperature and precipitation correlations regarding mean annual simulated mass balance per glaciological regions across the Andes |                              |                                |                              |                                |
|----------------------------------------------------------------------------------------------------------------------------------------------------------|------------------------------|--------------------------------|------------------------------|--------------------------------|
| Glaciological region                                                                                                                                     | Temperature mean correlation | Precipitation mean correlation | Temperature N° of catchments | Precipitation N° of catchments |
| Tropical Andes                                                                                                                                           | $-0.87 \pm 0.1$              | $0.65 \pm 0.1$                 | 183                          | 16                             |
| Dry Andes                                                                                                                                                | $-0.63 \pm 0.1$              | $0.75 \pm 0.1$                 | 131                          | 136                            |
| Wet Andes                                                                                                                                                | $-0.72 \pm 0.1$              | $0.69 \pm 0.1$                 | 415                          | 448                            |

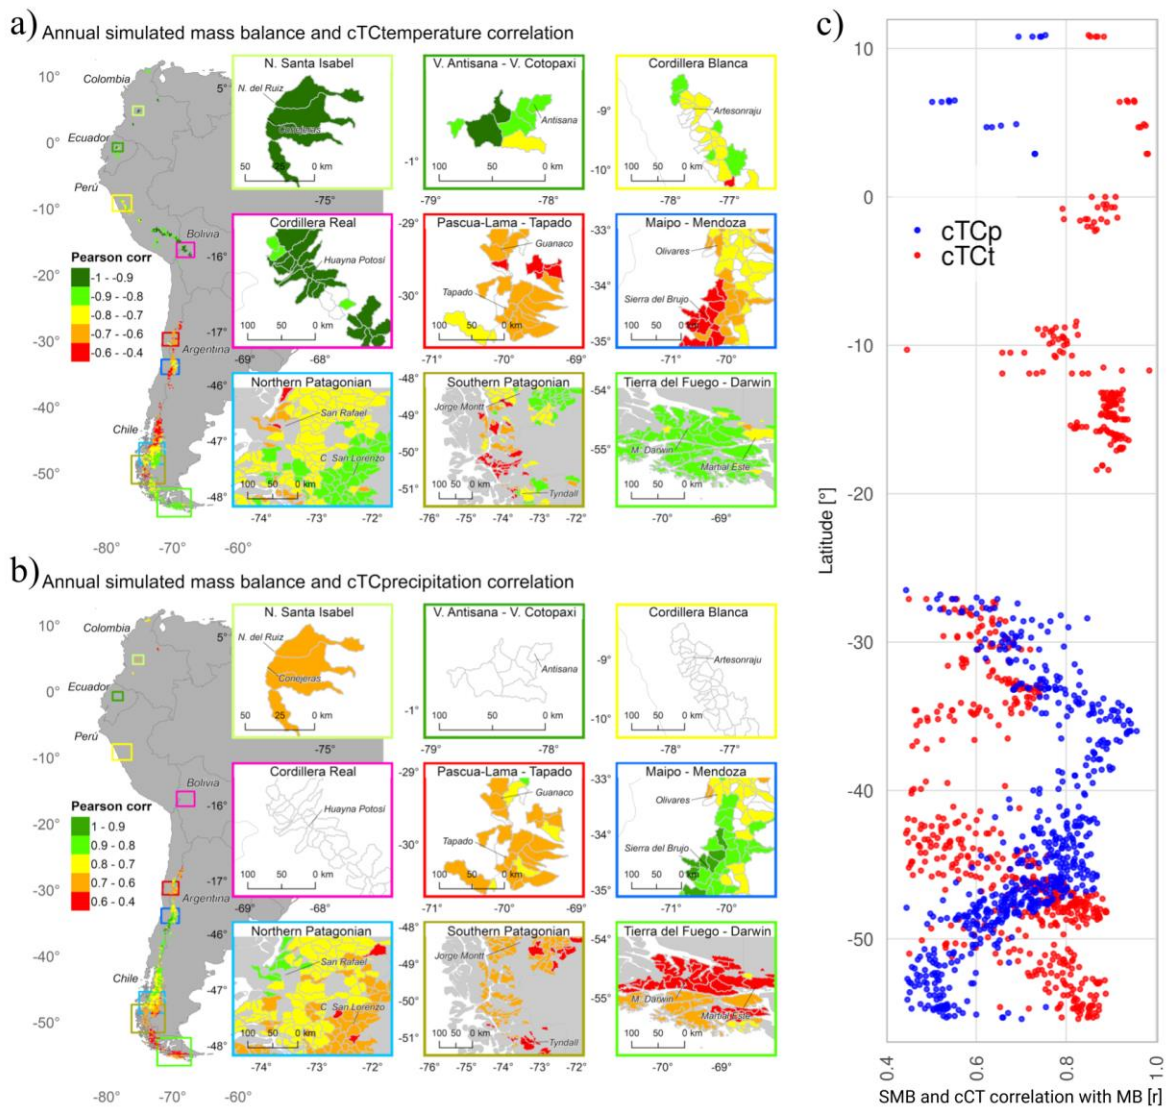

**Figure S5. Correlations between annual corrected temperature and precipitation with simulated annual mass balance for the period 2000-2019 at catchment scale. Correlations are presented by a) temperature and b) precipitation considering some interesting catchments across the Andes. c) Correlations are present to temperature (cTCp) and precipitation (cTCt), where the negative correlation of temperature was escalated to positive values for easier comparison with precipitation correlation. Mean values were extracted from each simulated glacier inside 729 catchments for temperature and 600 catchments for precipitation, considering statistically significant correlations in the 786 simulated catchments ( $< 0.05$ ).**

## 6 References

- Caro A, Condom T and Rabatel A. Climatic and Morphometric Explanatory Variables of Glacier Changes in the Andes (8–55°S): New Insights From Machine Learning Approaches. *Front. Earth Sci.* 9:713011. [https://doi:10.3389/feart.2021.713011](https://doi.org/10.3389/feart.2021.713011), 2021.
- CEAZA, datos meteorológicos de Chile [data set], <http://www.ceazamet.cl/>, 2022.
- CECs. Meteorological data measured by Centro de Estudios Científicos, 2018.
- DGA, datos de estudios hidrológicos de Chile [data set], <https://snia.mop.gob.cl/BNAConsultas/reportes>, 2022.
- GLACIOCLIM, Données météorologiques [data set], <https://glacioclim.osug.fr/Donnees-des-Andes>, 2022.

Hernández, J., Mazzorana, B., Loriaux, T., and Iribarren, P. Reconstrucción de caudales en la Cuenca Alta del Río Huasco, utilizando el modelo Cold Regional Hydrological Model (CRHM), AAGG2021, 2021.

IANIGLA, datos meteorológicos [data set], <https://observatorioandino.com/estaciones/>, 2022.

MacDonell, S., Kinnard, C., Mölg, T., Nicholson, L., and Abermann, J. Meteorological drivers of ablation processes on a cold glacier in the semi-arid Andes of Chile, *The Cryosphere*, 7, 1513–1526, <https://doi.org/10.5194/tc-7-1513-2013>, 2013.

Marangunic C., Ugalde F., Apey A., Armendáriz I., Bustamante M. and Peralta C. Ecosistemas de montaña de la cuenca alta del río Mapocho, Glaciares en la cuenca alta del río Mapocho: variaciones y características principales. AngloAmerican - CAPES UC, 2021.

Mateo, E. I., Mark, B. G., Hellström, R. Å., Baraer, M., McKenzie, J. M., Condom, T., Rapre, A. C., Gonzales, G., Gómez, J. Q., and Encarnación, R. C. C.: High-temporal-resolution hydrometeorological data collected in the tropical Cordillera Blanca, Peru (2004–2020), *Earth Syst. Sci. Data*, 14, 2865–2882, <https://doi.org/10.5194/essd-14-2865-2022>, 2022.

Rabatel, A., Castebrunet, H., Favier, V., Nicholson, L., and Kinnard, C. Glacier Changes in the Pascua-Lama Region, Chilean Andes (29° S): Recent Mass Balance and 50 Yr Surface Area Variations. *The Cryosphere* 5 (4), 1029–1041. <https://doi:10.5194/tc-5-1029-2011>, 2011.

Schaefer M., Rodriguez J., Scheiter M., and Casassa, G. Climate and surface mass balance of Mocho Glacier, Chilean Lake District, 40°S. *Journal of Glaciology*, 63(238), 218-228, <https://doi:10.1017/jog.2016.129>, 2017

SENAMHI, datos hidrometeorológicos de Perú [data set], <https://www.senamhi.gob.pe/?&p=descarga-datos-hidrometeorologicos>, 2022.

WGMS, Global Glacier Change Bulletin No. 4 (2018-2019) [data set]. Michael Zemp, Samuel U. Nussbaumer, Isabelle Gärtner-Roer, Jacqueline Bannwart, Frank Paul, and Martin Hoelzle (eds.), ISC (WDS) / IUGG (IACS) / UNEP/UNESCO/WMO, World Glacier Monitoring Service, Zurich, Switzerland, 278 pp. <https://doi.org/10.5904/wgms-fog-2021-05>, 2021.
